# Supplementary material
Source: HighWire-hosted journal article supplement (https://erj.ersjournals.com/content/55/4/1901761)
Supplement: inline-supplementary-material-2 [file inline-supplementary-material-2.pdf]

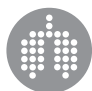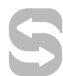

SHAREABLE PDF

# Cellular sources of interleukin-6 and associations with clinical phenotypes and outcomes in pulmonary arterial hypertension

Catherine E. Simpson<sup>1,8</sup>, Jenny Y. Chen<sup>2,8</sup>, Rachel L. Damico<sup>1</sup>, Paul M. Hassoun<sup>1</sup>, Lisa J. Martin<sup>3</sup>, Jun Yang<sup>4</sup>, Melanie Nies<sup>4</sup>, Megan Griffiths<sup>4</sup>, R. Dhananjay Vaidya<sup>5</sup>, Stephanie Brandal<sup>4</sup>, Michael W. Pauciulo<sup>3</sup>, Katie A. Lutz<sup>3</sup>, Anna W. Coleman<sup>3</sup>, Eric D. Austin<sup>6</sup>, Dunbar D. Ivy<sup>7</sup>, William C. Nichols<sup>3</sup> and Allen D. Everett<sup>4</sup>

**Affiliations:** <sup>1</sup>Johns Hopkins University, Department of Medicine, Division of Pulmonary and Critical Care Medicine, Baltimore, MD, USA. <sup>2</sup>Johns Hopkins University School of Medicine, Baltimore, MD, USA. <sup>3</sup>Division of Human Genetics, Cincinnati Children's Hospital Medical Center, Department of Pediatrics, University of Cincinnati College of Medicine, Cincinnati, OH, USA. <sup>4</sup>Johns Hopkins University, Department of Pediatrics, Division of Pediatric Cardiology, Baltimore, MD, USA. <sup>5</sup>Johns Hopkins University, Department of Medicine, Division of General Internal Medicine, Baltimore, MD, USA. <sup>6</sup>Vanderbilt University, Department of Pediatrics, Division of Allergy, Immunology, and Pulmonary Medicine, Nashville, TN, USA. <sup>7</sup>Children's Hospital Colorado, Department of Pediatric Cardiology, Denver, CO, USA. <sup>8</sup>Both authors contributed equally.

**Correspondence:** Allen D. Everett, 1800 Orleans St, Room M2303, Baltimore, MD 21287, USA. E-mail: aeeveret3@jhmi.edu

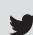

@ERSpublications

**Circulating IL-6, a pro-inflammatory cytokine produced by pulmonary arterial smooth muscle cells, is significantly associated with clinical phenotypes and survival in pulmonary arterial hypertension, which may guide individualised disease management** <https://bit.ly/3awkkSz>

**Cite this article as:** Simpson CE, Chen JY, Damico RL, *et al.* Cellular sources of interleukin-6 and associations with clinical phenotypes and outcomes in pulmonary arterial hypertension. *Eur Respir J* 2020; 55: 1901761 [<https://doi.org/10.1183/13993003.01761-2019>].

This single-page version can be shared freely online.

**ABSTRACT** The pro-inflammatory cytokine interleukin (IL)-6 has been associated with outcomes in small pulmonary arterial hypertension (PAH) cohorts composed largely of patients with severe idiopathic PAH (IPAH). It is unclear whether IL-6 is a marker of critical illness or a mechanistic biomarker of pulmonary vascular remodelling. We hypothesised that IL-6 is produced by pulmonary vascular cells and sought to explore IL-6 associations with phenotypes and outcomes across diverse subtypes in a large PAH cohort.

IL-6 protein and gene expression levels were measured in cultured pulmonary artery smooth muscle cells (PASMCs) and endothelial cells (PAECs) from PAH patients and healthy controls. Serum IL-6 was measured in 2017 well-characterised PAH subjects representing each PAH subgroup. Relationships between IL-6 levels, clinical variables, and mortality were analysed using regression models.

Significantly higher IL-6 protein and gene expression levels were produced by PASMCs than by PAECs in PAH ( $p < 0.001$ ), while there was no difference in IL-6 between cell types in controls. Serum IL-6 was highest in PAH related to portal hypertension and connective tissue diseases (CTD-PAH). In multivariable modelling, serum IL-6 was associated with survival in the overall cohort (hazard ratio 1.22, 95% CI 1.08–1.38;  $p < 0.01$ ) and in IPAH, but not in CTD-PAH. IL-6 remained associated with survival in low-risk subgroups of subjects with mild disease.

IL-6 is released from PASMCs, and circulating IL-6 is associated with specific clinical phenotypes and outcomes in various PAH subgroups, including subjects with less severe disease. IL-6 is a mechanistic biomarker, and thus a potential therapeutic target, in certain PAH subgroups.
